# Supplementary material
Source: PubMed Central journal article supplement (PMC6048963)
Supplement: NIHMS980608-supplement-Sup_Figs_1_and_2.pdf [file NIHMS980608-supplement-Sup_Figs_1_and_2.pdf]

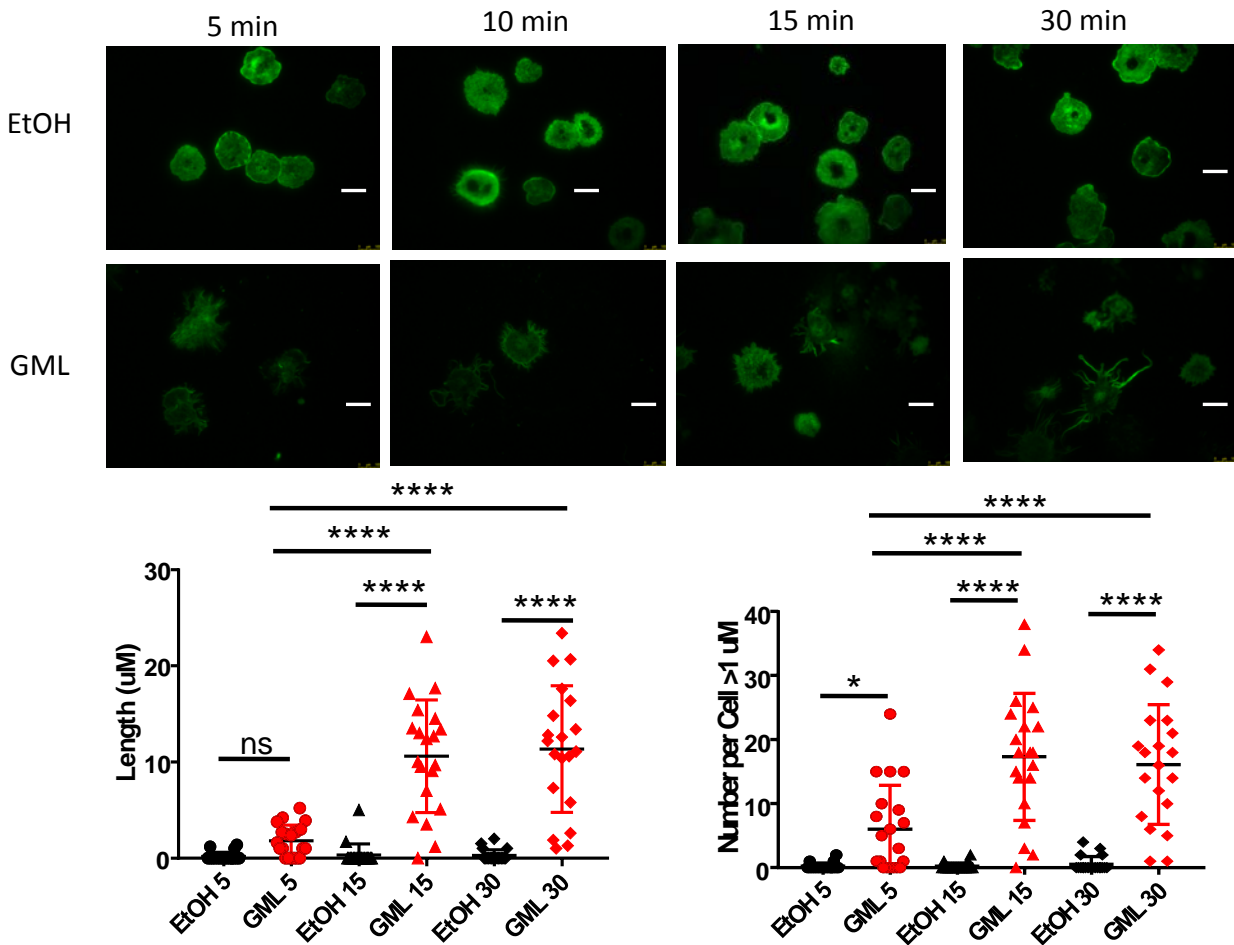

**Fig. S1. Time course of GML-induced filopodia formation.** Epifluorescence microscopy of activated T cells treated with ethanol or GML that were stimulated with anti-CD3 for the indicated times and stained with TMR-conjugated phalloidin. Top: Images are representative of 2 independent experiments. Bottom: Filopodia length and numbers. Data are means  $\pm$  SEM of 20 cells from 2 donors. Scale Bar, 10  $\mu$ M. \* $P$ <0.05 and \*\*\*\* $P$ <0.0001 by one-way ANOVA.

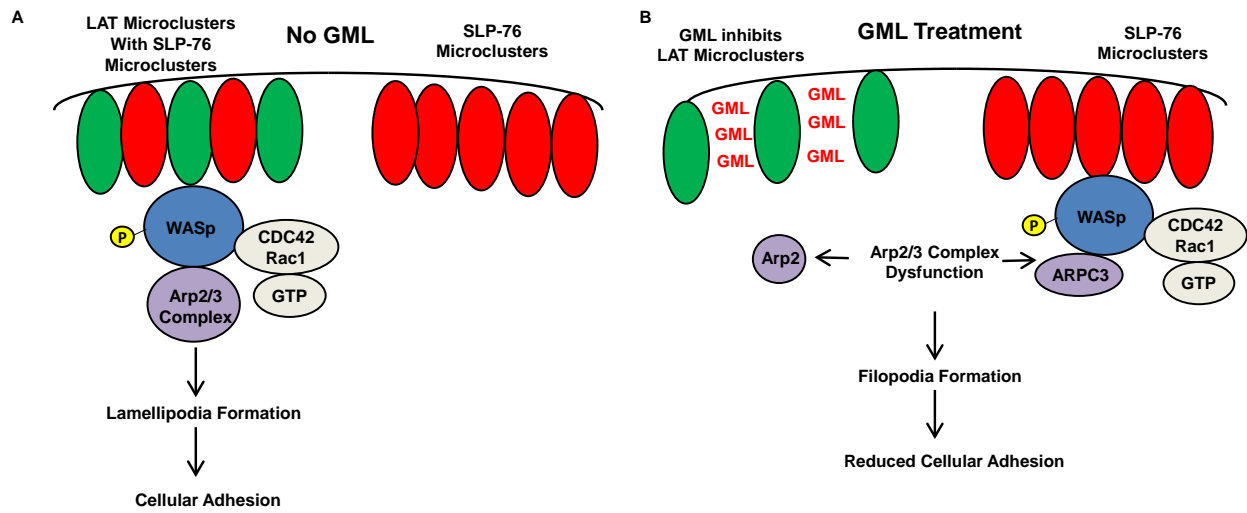

**Fig. S2. Model depicting the effects of GML on T cell adhesion.** (A) LAT and SLP-76 microclusters regulate T cell adhesion under normal conditions. LAT microclusters (green) associated with SLP-76 microclusters (red) induce the activation of WASp (blue) in the appropriate context. This leads to the appropriate activation of the Arp2/3 complex and polymerization of actin in a wave-like manner to form lamellipodia, which ultimately results in cellular adhesion. (B) GML alters the interaction between LAT and SLP-76 microclusters, which leads to reduced cellular adhesion. GML inhibits the formation of LAT microclusters, which prevents the association between LAT and SLP-76 microclusters. SLP-76 microclusters alone activate WASp inappropriately, leading to the altered localization of the Arp2/3 complex components Arp2 and ARPC3. This results in defective Arp2/3 complex activity, abnormal filopodia formation, and ultimately decreased cellular adhesion.
